# Supplementary material for: TREM2 activation on microglia promotes myelin debris clearance and remyelination in a model of multiple sclerosis
Source: Acta Neuropathol. 2020 Aug 9;140(4):513–34. doi: 10.1007/s00401-020-02193-z (PMC7498497; doi:10.1007/s00401-020-02193-z)
Supplement: Supplementary file 3 — Supplementary material 3 (XLSX 10 kb) [file 401_2020_2193_MOESM3_ESM.xlsx]

## Sheet: S2
Table S2. Pathway analysis of the differentially expressed genes in NHD patients (KEGG)
Term	Genes	Pop Hits	Pop Total	Fold Enrichment	P Value	Benjamini	FDR
hsa04062:Chemokine signaling pathway	CXCL1, CCL3, CCL2, CXCL5, CXCL3, CXCL2, CXCL8, NFKBIA, CCL8, NFKB1, GNG12, CXCL6, CCL5, CCL4, CCL7, CCL23, CCL3L1, CCL3L3, GNG2, PIK3R5, PAK1, CHUK, AKT3, LYN, ROCK1, NCF1, HCK, CCL4L1, CCL4L2, CCL18, CCL13, PPBP, GSK3B, JAK2, XCL1, XCL2	186	6879	3.10354	2.21796e-09	2.9277e-07	2.90602e-06
hsa04060:Cytokine-cytokine receptor interaction	CXCL1, IL1R2, CCL3, CCL2, TNF, CXCL5, CXCL3, IL18, CXCL2, BMPR2, TNFSF15, CXCL8, CCL8, CXCL6, CCL5, CCL4, CCL7, CCL23, CCL3L1, CCL3L3, IL1B, IL13RA1, IFNGR2, CSF2RA, IFNGR1, IL1A, IL6, TGFBR1, CCL4L1, CCL4L2, CCL18, IFNAR1, ACVR2A, CCL13, IL20RB, PPBP, XCL1, XCL2, IL3RA	243	6879	2.57351	8.85777e-08	4.67689e-06	0.000116057
hsa04620:Toll-like receptor signaling pathway	IL6, CCL3, TNF, LY96, TLR1, TLR2, CXCL8, NFKBIA, CCL4L1, NFKB1, CCL4L2, CCL5, CCL4, TLR8, IFNAR1, CTSK, CCL3L1, CCL3L3, MAP3K8, IL1B, PIK3R5, CHUK, AKT3, TRAF3	106	6879	3.63056	9.18505e-08	3.46407e-06	0.000120345
hsa04621:NOD-like receptor signaling pathway	CXCL1, IL6, TNF, CCL2, IL18, CXCL2, CXCL8, NFKBIA, NFKB1, BIRC3, NLRP3, CCL5, RIPK2, IL1B, CASP1, TNFAIP3, CHUK	56	6879	4.86776	1.57796e-07	5.20724e-06	0.000206748
hsa04640:Hematopoietic cell lineage	IL1R2, CR1, IL6, TNF, HLA-DRB1, ITGA2, CD1B, CD1A, ANPEP, ITGB3, CD38, CD44, CD33, HLA-DRB4, IL1B, HLA-DRB5, IL1A, CSF2RA, IL3RA	87	6879	3.50189	4.82927e-06	8.49917e-05	0.00632725
hsa04668:TNF signaling pathway	CXCL1, ICAM1, IL6, TNF, CCL2, DNM1L, CXCL3, MMP9, CXCL2, NFKBIA, NFKB1, BIRC3, CCL5, MMP14, MAP3K8, IL1B, PIK3R5, TNFAIP3, CHUK, AKT3, TRAF3	107	6879	3.14705	7.44783e-06	0.000122882	0.00975791
hsa04145:Phagosome	MRC1, HLA-DQB1, DYNC1LI1, OLR1, HLA-DRB1, NCF1, C3, TLR2, ITGA2, EEA1, COLEC12, ITGB3, HLA-DQA2, HLA-DQA1, MARCO, FCGR2B, FCAR, ITGAV, DYNC2H1, HLA-DRB4, RAB5A, HLA-DRB5, SEC22B, CLEC7A, THBS1	150	6879	2.67249	1.52752e-05	0.000237188	0.0200121
hsa04064:NF-kappa B signaling pathway	ICAM1, TNF, LYN, LY96, RELB, CXCL8, CCL4L1, NFKBIA, NFKB1, CCL4L2, BIRC3, CCL4, DDX58, CCL13, IL1B, TNFAIP3, CHUK, TRAF3	87	6879	3.31758	1.96983e-05	0.000273668	0.0258061
